# Supplementary material for: New 2D zinc phosphonates with heptanuclear units, reversible dehydration–hydration and bright luminescence
Source: Royal Society of Chemistry journal article supplement (doi:10.1039/c4ce00322e), 2014-01-01
Supplement: c4ce00322e1.pdf [file c4ce00322e1.pdf]

## Supplementary information

### New 2D zinc phosphonates with heptanuclear units, reversible dehydration-hydration and bright luminescence

Ruibiao Fu\*, Shengmin Hu, Xintao Wu

*State Key Laboratory of Structural Chemistry, Fujian Institute of Research on the Structure of Matter, Chinese Academy of Science, Fuzhou, Fujian, 350002 China*

● Corresponding author. E-mail: furb@fjirsm.ac.cn

**Table S1.** Selected bond lengths (Å) and angles (°) for **1**

|             |          |                           |           |
|-------------|----------|---------------------------|-----------|
| Zn(1)-O(3)  | 2.117(5) | Zn(10)-O(42)              | 2.043(5)  |
| Zn(1)-O(8)  | 2.079(4) | Zn(11)-N(16)              | 1.999(7)  |
| Zn(1)-O(13) | 2.153(4) | Zn(11)-O(27)              | 2.022(5)  |
| Zn(1)-O(18) | 2.125(4) | Zn(11)-O(32) <sup>e</sup> | 2.007(5)  |
| Zn(1)-O(23) | 2.089(5) | Zn(11)-O(37) <sup>d</sup> | 1.959(5)  |
| Zn(1)-O(28) | 2.151(4) | Zn(12)-O(33)              | 2.225(8)  |
| Zn(2)-N(1)  | 2.127(6) | Zn(12)-O(33) <sup>d</sup> | 1.973(8)  |
| Zn(2)-O(1)  | 2.082(5) | Zn(12)-O(38)              | 2.274(7)  |
| Zn(2)-O(3)  | 2.240(4) | Zn(12)-O(38) <sup>d</sup> | 2.004(7)  |
| Zn(2)-O(9)  | 1.930(4) | Zn(12)-O(43)              | 2.354(8)  |
| Zn(2)-O(30) | 1.948(5) | Zn(12)-O(43) <sup>d</sup> | 1.975(8)  |
| Zn(3)-N(2)  | 2.137(5) | Zn(13)-N(7)               | 2.144(9)  |
| Zn(3)-O(6)  | 2.112(5) | Zn(13)-O(31)              | 2.109(6)  |
| Zn(3)-O(8)  | 2.159(4) | Zn(13)-O(33)              | 2.149(6)  |
| Zn(3)-O(14) | 1.936(4) | Zn(13)-O(40) <sup>d</sup> | 1.967(9)  |
| Zn(3)-O(20) | 1.982(4) | Zn(13)-O(44)              | 1.963(6)  |
| Zn(4)-N(3)  | 2.290(6) | Zn(14)-N(8)               | 2.138(8)  |
| Zn(4)-O(4)  | 1.951(5) | Zn(14)-O(34)              | 1.936(6)  |
| Zn(4)-O(11) | 2.000(5) | Zn(14)-O(36)              | 2.087(5)  |
| Zn(4)-O(13) | 2.033(4) | Zn(14)-O(38)              | 2.219(5)  |
| Zn(4)-O(25) | 1.993(6) | Zn(14)-O(45) <sup>d</sup> | 1.969(8)  |
| Zn(5)-N(4)  | 2.112(6) | Zn(15)-N(9)               | 2.314(10) |
| Zn(5)-O(15) | 1.955(5) | Zn(15)-O(35) <sup>d</sup> | 1.985(9)  |
| Zn(5)-O(16) | 2.102(5) | Zn(15)-O(39)              | 1.947(6)  |
| Zn(5)-O(18) | 2.218(4) | Zn(15)-O(41)              | 2.014(6)  |
| Zn(5)-O(24) | 1.946(5) | Zn(15)-O(43)              | 2.047(6)  |
| Zn(6)-N(5)  | 2.196(6) | Zn(16)-O(48)              | 2.140(7)  |
| Zn(6)-O(5)  | 1.987(6) | Zn(16)-O(48) <sup>b</sup> | 2.140(7)  |
| Zn(6)-O(21) | 2.094(5) | Zn(16)-O(53)              | 2.081(6)  |

|                          |            |                                               |            |
|--------------------------|------------|-----------------------------------------------|------------|
| Zn(6)-O(23)              | 2.127(5)   | Zn(16)-O(53) <sup>b</sup>                     | 2.081(6)   |
| Zn(6)-O(29)              | 1.953(5)   | Zn(16)-O(58)                                  | 2.123(5)   |
| Zn(7)-N(6)               | 2.272(6)   | Zn(16)-O(58) <sup>b</sup>                     | 2.123(5)   |
| Zn(7)-O(10)              | 1.997(5)   | Zn(17)-N(10)                                  | 2.250(9)   |
| Zn(7)-O(19)              | 1.968(5)   | Zn(17)-O(46)                                  | 2.042(6)   |
| Zn(7)-O(26)              | 2.033(5)   | Zn(17)-O(48)                                  | 2.055(6)   |
| Zn(7)-O(28)              | 2.064(5)   | Zn(17)-O(55) <sup>b</sup>                     | 1.980(8)   |
| Zn(8)-N(13)              | 2.012(8)   | Zn(17)-O(59)                                  | 1.958(6)   |
| Zn(8)-O(17)              | 1.965(5)   | Zn(18)-N(11)                                  | 2.172(9)   |
| Zn(8)-O(22) <sup>a</sup> | 2.006(5)   | Zn(18)-O(50)                                  | 1.959(6)   |
| Zn(8)-O(47) <sup>b</sup> | 2.022(5)   | Zn(18)-O(51)                                  | 2.087(6)   |
| Zn(9)-N(14)              | 1.996(8)   | Zn(18)-O(53)                                  | 2.120(6)   |
| Zn(9)-O(12)              | 2.029(6)   | Zn(18)-O(60) <sup>b</sup>                     | 1.959(8)   |
| Zn(9)-O(52) <sup>c</sup> | 2.012(6)   | Zn(19)-N(12)                                  | 2.145(7)   |
| Zn(9)-O(57)              | 1.969(5)   | Zn(19)-O(49) <sup>b</sup>                     | 1.934(7)   |
| Zn(10)-N(15)             | 2.023(7)   | Zn(19)-O(54)                                  | 1.918(6)   |
| Zn(10)-O(2)              | 1.956(5)   | Zn(19)-O(56)                                  | 2.091(5)   |
| Zn(10)-O(7) <sup>c</sup> | 2.015(5)   | Zn(19)-O(58)                                  | 2.229(5)   |
|                          |            |                                               |            |
| O(3)-Zn(1)-O(8)          | 93.23(17)  | N(16)-Zn(11)-O(37) <sup>d</sup>               | 124.3(3)   |
| O(3)-Zn(1)-O(13)         | 93.35(17)  | O(27)-Zn(11)-O(32) <sup>e</sup>               | 106.2(2)   |
| O(3)-Zn(1)-O(18)         | 178.24(16) | O(27)-Zn(11)-O(37) <sup>d</sup>               | 103.8(2)   |
| O(3)-Zn(1)-O(23)         | 87.09(18)  | O(32) <sup>e</sup> -Zn(11)-O(37) <sup>d</sup> | 102.5(2)   |
| O(3)-Zn(1)-O(28)         | 86.37(17)  | O(33)-Zn(12)-O(33) <sup>d</sup>               | 166.21(15) |
| O(8)-Zn(1)-O(13)         | 91.86(17)  | O(33)-Zn(12)-O(38)                            | 86.0(3)    |
| O(8)-Zn(1)-O(18)         | 86.71(17)  | O(33)-Zn(12)-O(38) <sup>d</sup>               | 85.8(3)    |
| O(8)-Zn(1)-O(23)         | 179.36(18) | O(33)-Zn(12)-O(43)                            | 82.3(3)    |
| O(8)-Zn(1)-O(28)         | 88.61(16)  | O(33)-Zn(12)-O(43) <sup>d</sup>               | 90.1(3)    |
| O(13)-Zn(1)-O(18)        | 84.89(17)  | O(33) <sup>d</sup> -Zn(12)-O(38)              | 85.1(3)    |
| O(13)-Zn(1)-O(23)        | 88.68(18)  | O(33) <sup>d</sup> -Zn(12)-O(38) <sup>d</sup> | 100.9(3)   |
| O(13)-Zn(1)-O(28)        | 179.47(17) | O(33) <sup>d</sup> -Zn(12)-O(43)              | 86.5(3)    |
| O(18)-Zn(1)-O(23)        | 92.98(18)  | O(33) <sup>d</sup> -Zn(12)-O(43) <sup>d</sup> | 99.6(3)    |
| O(18)-Zn(1)-O(28)        | 95.39(17)  | O(38)-Zn(12)-O(38) <sup>d</sup>               | 166.73(17) |
| O(23)-Zn(1)-O(28)        | 90.86(17)  | O(38)-Zn(12)-O(43)                            | 85.9(3)    |
| N(1)-Zn(2)-O(1)          | 80.1(2)    | O(38)-Zn(12)-O(43) <sup>d</sup>               | 85.5(3)    |
| N(1)-Zn(2)-O(3)          | 80.80(19)  | O(38) <sup>d</sup> -Zn(12)-O(43)              | 82.8(3)    |
| N(1)-Zn(2)-O(9)          | 119.6(2)   | O(38) <sup>d</sup> -Zn(12)-O(43) <sup>d</sup> | 104.8(3)   |
| N(1)-Zn(2)-O(30)         | 124.4(2)   | O(43)-Zn(12)-O(43) <sup>d</sup>               | 168.9(2)   |
| O(1)-Zn(2)-O(3)          | 160.88(18) | N(7)-Zn(13)-O(31)                             | 79.9(3)    |
| O(1)-Zn(2)-O(9)          | 93.84(19)  | N(7)-Zn(13)-O(33)                             | 82.6(3)    |
| O(1)-Zn(2)-O(30)         | 100.9(2)   | N(7)-Zn(13)-O(40) <sup>d</sup>                | 126.4(3)   |
| O(3)-Zn(2)-O(9)          | 96.84(18)  | N(7)-Zn(13)-O(44)                             | 117.1(4)   |
| O(3)-Zn(2)-O(30)         | 88.67(18)  | O(31)-Zn(13)-O(33)                            | 161.0(2)   |
| O(9)-Zn(2)-O(30)         | 115.8(2)   | O(31)-Zn(13)-O(40) <sup>d</sup>               | 96.8(3)    |

|                   |            |                                               |            |
|-------------------|------------|-----------------------------------------------|------------|
| N(2)-Zn(3)-O(6)   | 80.40(19)  | O(31)-Zn(13)-O(44)                            | 94.3(2)    |
| N(2)-Zn(3)-O(8)   | 82.20(18)  | O(33)-Zn(13)-O(40) <sup>d</sup>               | 87.7(3)    |
| N(2)-Zn(3)-O(14)  | 118.4(2)   | O(33)-Zn(13)-O(44)                            | 100.2(2)   |
| N(2)-Zn(3)-O(20)  | 125.32(19) | O(40) <sup>d</sup> -Zn(13)-O(44)              | 116.5(3)   |
| O(6)-Zn(3)-O(8)   | 161.81(17) | N(8)-Zn(14)-O(34)                             | 117.2(3)   |
| O(6)-Zn(3)-O(14)  | 94.13(19)  | N(8)-Zn(14)-O(36)                             | 80.6(2)    |
| O(6)-Zn(3)-O(20)  | 96.37(19)  | N(8)-Zn(14)-O(38)                             | 81.1(3)    |
| O(8)-Zn(3)-O(14)  | 98.76(17)  | N(8)-Zn(14)-O(45) <sup>d</sup>                | 127.0(3)   |
| O(8)-Zn(3)-O(20)  | 89.38(17)  | O(34)-Zn(14)-O(36)                            | 92.9(2)    |
| O(14)-Zn(3)-O(20) | 116.30(19) | O(34)-Zn(14)-O(38)                            | 96.5(2)    |
| N(3)-Zn(4)-O(4)   | 112.4(2)   | O(34)-Zn(14)-O(45) <sup>d</sup>               | 115.7(3)   |
| N(3)-Zn(4)-O(11)  | 78.0(2)    | O(36)-Zn(14)-O(38)                            | 161.6(2)   |
| N(3)-Zn(4)-O(13)  | 82.15(19)  | O(36)-Zn(14)-O(45) <sup>d</sup>               | 101.1(2)   |
| N(3)-Zn(4)-O(25)  | 134.6(2)   | O(38)-Zn(14)-O(45) <sup>d</sup>               | 89.0(3)    |
| O(4)-Zn(4)-O(11)  | 103.7(2)   | N(9)-Zn(15)-O(35) <sup>d</sup>                | 130.0(3)   |
| O(4)-Zn(4)-O(13)  | 105.76(18) | N(9)-Zn(15)-O(39)                             | 114.5(3)   |
| O(4)-Zn(4)-O(25)  | 112.6(2)   | N(9)-Zn(15)-O(41)                             | 78.0(3)    |
| O(11)-Zn(4)-O(13) | 149.04(19) | N(9)-Zn(15)-O(43)                             | 82.8(3)    |
| O(11)-Zn(4)-O(25) | 85.8(2)    | O(35) <sup>d</sup> -Zn(15)-O(39)              | 115.2(3)   |
| O(13)-Zn(4)-O(25) | 91.6(2)    | O(35) <sup>d</sup> -Zn(15)-O(41)              | 86.0(3)    |
| N(4)-Zn(5)-O(15)  | 124.9(2)   | O(35) <sup>d</sup> -Zn(15)-O(43)              | 89.8(3)    |
| N(4)-Zn(5)-O(16)  | 80.3(2)    | O(39)-Zn(15)-O(41)                            | 102.8(3)   |
| N(4)-Zn(5)-O(18)  | 81.47(19)  | O(39)-Zn(15)-O(43)                            | 105.2(2)   |
| N(4)-Zn(5)-O(24)  | 117.7(2)   | O(41)-Zn(15)-O(43)                            | 150.8(2)   |
| O(15)-Zn(5)-O(16) | 98.9(2)    | O(48)-Zn(16)-O(48) <sup>b</sup>               | 180.0(4)   |
| O(15)-Zn(5)-O(18) | 90.31(18)  | O(48)-Zn(16)-O(53)                            | 92.2(3)    |
| O(15)-Zn(5)-O(24) | 117.4(2)   | O(48)-Zn(16)-O(53) <sup>b</sup>               | 87.8(3)    |
| O(16)-Zn(5)-O(18) | 161.69(18) | O(48)-Zn(16)-O(58)                            | 94.4(2)    |
| O(16)-Zn(5)-O(24) | 91.7(2)    | O(48)-Zn(16)-O(58) <sup>b</sup>               | 85.6(2)    |
| O(18)-Zn(5)-O(24) | 98.12(19)  | O(48) <sup>b</sup> -Zn(16)-O(53)              | 87.8(3)    |
| N(5)-Zn(6)-O(5)   | 128.8(2)   | O(48) <sup>b</sup> -Zn(16)-O(53) <sup>b</sup> | 94.4(2)    |
| N(5)-Zn(6)-O(21)  | 80.2(2)    | O(48) <sup>b</sup> -Zn(16)-O(58)              | 85.6(2)    |
| N(5)-Zn(6)-O(23)  | 82.7(2)    | O(48) <sup>b</sup> -Zn(16)-O(58) <sup>b</sup> | 92.2(3)    |
| N(5)-Zn(6)-O(29)  | 115.6(2)   | O(53)-Zn(16)-O(53) <sup>b</sup>               | 180.000(3) |
| O(5)-Zn(6)-O(21)  | 92.1(2)    | O(53)-Zn(16)-O(58)                            | 93.1(2)    |
| O(5)-Zn(6)-O(23)  | 89.2(2)    | O(53)-Zn(16)-O(58) <sup>b</sup>               | 86.9(2)    |
| O(5)-Zn(6)-O(29)  | 115.7(2)   | O(53) <sup>b</sup> -Zn(16)-O(58)              | 86.9(2)    |
| O(21)-Zn(6)-O(23) | 158.96(19) | O(53) <sup>b</sup> -Zn(16)-O(58) <sup>b</sup> | 93.1(2)    |
| O(21)-Zn(6)-O(29) | 97.2(2)    | O(58)-Zn(16)-O(58) <sup>b</sup>               | 180.000(2) |
| O(23)-Zn(6)-O(29) | 101.20(18) | N(10)-Zn(17)-O(46)                            | 78.9(3)    |
| N(6)-Zn(7)-O(10)  | 125.3(2)   | N(10)-Zn(17)-O(48)                            | 83.3(3)    |
| N(6)-Zn(7)-O(19)  | 118.1(2)   | N(10)-Zn(17)-O(55) <sup>b</sup>               | 130.2(3)   |
| N(6)-Zn(7)-O(26)  | 78.49(19)  | N(10)-Zn(17)-O(59)                            | 115.9(3)   |
| N(6)-Zn(7)-O(28)  | 83.41(19)  | O(46)-Zn(17)-O(48)                            | 152.6(2)   |

|                                             |            |                                  |          |
|---------------------------------------------|------------|----------------------------------|----------|
| O(10)-Zn(7)-O(19)                           | 116.27(19) | O(46)-Zn(17)-O(55) <sup>b</sup>  | 85.8(3)  |
| O(10)-Zn(7)-O(26)                           | 86.17(19)  | O(46)-Zn(17)-O(59)               | 100.9(2) |
| O(10)-Zn(7)-O(28)                           | 88.90(19)  | O(48)-Zn(17)-O(55) <sup>b</sup>  | 90.0(3)  |
| O(19)-Zn(7)-O(26)                           | 101.19(19) | O(48)-Zn(17)-O(59)               | 105.5(2) |
| O(19)-Zn(7)-O(28)                           | 104.19(18) | O(55) <sup>b</sup> -Zn(17)-O(59) | 113.5(3) |
| O(26)-Zn(7)-O(28)                           | 153.66(18) | N(11)-Zn(18)-O(50)               | 115.8(4) |
| N(13)-Zn(8)-O(17)                           | 125.7(3)   | N(11)-Zn(18)-O(51)               | 80.7(3)  |
| N(13)-Zn(8)-O(22) <sup>a</sup>              | 106.8(3)   | N(11)-Zn(18)-O(53)               | 81.6(3)  |
| N(13)-Zn(8)-O(47) <sup>b</sup>              | 111.7(3)   | N(11)-Zn(18)-O(60) <sup>b</sup>  | 127.5(3) |
| O(17)-Zn(8)-O(22) <sup>a</sup>              | 101.2(2)   | O(50)-Zn(18)-O(51)               | 95.6(2)  |
| O(17)-Zn(8)-O(47) <sup>b</sup>              | 104.3(2)   | O(50)-Zn(18)-O(53)               | 99.6(2)  |
| O(22) <sup>a</sup> -Zn(8)-(47) <sup>b</sup> | 105.0(2)   | O(50)-Zn(18)-O(60) <sup>b</sup>  | 116.7(3) |
| N(14)-Zn(9)-O(12)                           | 116.2(3)   | O(51)-Zn(18)-O(53)               | 160.4(2) |
| N(14)-Zn(9)-O(52) <sup>c</sup>              | 106.3(3)   | O(51)-Zn(18)-O(60) <sup>b</sup>  | 95.2(2)  |
| N(14)-Zn(9)-O(57)                           | 125.3(3)   | O(53)-Zn(18)-O(60) <sup>b</sup>  | 89.1(3)  |
| O(12)-Zn(9)-O(52) <sup>c</sup>              | 104.7(2)   | N(12)-Zn(19)-O(49) <sup>b</sup>  | 124.5(3) |
| O(12)-Zn(9)-O(57)                           | 101.2(2)   | N(12)-Zn(19)-O(54)               | 119.6(3) |
| O(52) <sup>c</sup> -Zn(9)-O(57)             | 100.5(2)   | N(12)-Zn(19)-O(56)               | 80.1(2)  |
| N(15)-Zn(10)-O(2)                           | 125.1(2)   | N(12)-Zn(19)-O(58)               | 81.7(2)  |
| N(15)-Zn(10)-O(7) <sup>c</sup>              | 104.5(2)   | O(49) <sup>b</sup> -Zn(19)-O(54) | 115.9(3) |
| N(15)-Zn(10)-O(42)                          | 117.3(3)   | O(49) <sup>b</sup> -Zn(19)-O(56) | 100.4(3) |
| O(2)-Zn(10)-O(7) <sup>c</sup>               | 101.3(2)   | O(49) <sup>b</sup> -Zn(19)-O(58) | 88.9(2)  |
| O(2)-Zn(10)-O(42)                           | 100.6(2)   | O(54)-Zn(19)-O(56)               | 92.8(2)  |
| O(7) <sup>c</sup> -Zn(10)-O(42)             | 105.9(2)   | O(54)-Zn(19)-O(58)               | 97.2(2)  |
| N(16)-Zn(11)-O(27)                          | 112.3(2)   | O(56)-Zn(19)-O(58)               | 161.8(2) |
| N(16)-Zn(11)-O(32) <sup>e</sup>             | 106.1(2)   |                                  |          |

Symmetry codes: a  $x + 1, y, z$ ; b  $-x + 1, -y, -z + 2$ ; c  $x - 1, y, z$ ; d  $-x - 1, -y + 1, -z + 1$ ; e  $-x, -y + 1, -z + 1$ .

**Table S2.** Selected bond lengths (Å) and angles (°) for **2**

|                                             |            |                                            |            |
|---------------------------------------------|------------|--------------------------------------------|------------|
| Zn(1)-O(1)                                  | 2.142(2)   | Zn(3)-O(6)                                 | 2.116(2)   |
| Zn(1)-O(1) <sup>a</sup>                     | 2.142(2)   | Zn(3)-O(9)                                 | 2.133(2)   |
| Zn(1)-O(6)                                  | 2.117(2)   | Zn(3)-O(12) <sup>a</sup>                   | 1.965(2)   |
| Zn(1)-O(6) <sup>a</sup>                     | 2.117(2)   | Zn(4)-N(1) <sup>a</sup>                    | 2.183(3)   |
| Zn(1)-O(11)                                 | 2.110(2)   | Zn(4)-O(1) <sup>a</sup>                    | 2.168(2)   |
| Zn(1)-O(11) <sup>a</sup>                    | 2.110(2)   | Zn(4)-O(4) <sup>a</sup>                    | 2.103(2)   |
| Zn(2)-N(3)                                  | 2.134(3)   | Zn(4)-O(8)                                 | 1.959(2)   |
| Zn(2)-O(2)                                  | 1.953(2)   | Zn(4)-O(13)                                | 1.956(2)   |
| Zn(2)-O(7)                                  | 1.951(2)   | Zn(5)-N(4)                                 | 2.083(4)   |
| Zn(2)-O(11)                                 | 2.203(2)   | Zn(5)-N(5)                                 | 2.082(3)   |
| Zn(2)-O(14)                                 | 2.072(2)   | Zn(5)-N(6)                                 | 2.219(4)   |
| Zn(3)-N(2)                                  | 2.152(3)   | Zn(5)-O(5) <sup>b</sup>                    | 1.981(3)   |
| Zn(3)-O(3)                                  | 1.952(2)   | Zn(5)-O(10)                                | 2.126(3)   |
| O(1)-Zn(1)-O(1) <sup>a</sup>                | 180.00(15) | N(2)-Zn(3)-O(12) <sup>a</sup>              | 127.17(10) |
| O(1)-Zn(1)-O(6)                             | 91.11(8)   | O(3)-Zn(3)-O(6)                            | 95.39(9)   |
| O(1)-Zn(1)-O(6) <sup>a</sup>                | 88.89(8)   | O(3)-Zn(3)-O(9)                            | 100.40(10) |
| O(1)-Zn(1)-O(11)                            | 92.65(8)   | O(3)-Zn(3)-O(12) <sup>a</sup>              | 124.56(10) |
| O(1)-Zn(1)-O(11) <sup>a</sup>               | 87.35(8)   | O(6)-Zn(3)-O(9)                            | 160.25(9)  |
| O(1) <sup>a</sup> -Zn(1)-O(6)               | 88.89(8)   | O(6)-Zn(3)-O(12) <sup>a</sup>              | 94.16(9)   |
| O(1) <sup>a</sup> -Zn(1)-O(6) <sup>a</sup>  | 91.11(8)   | O(9)-Zn(3)-O(12) <sup>a</sup>              | 86.64(9)   |
| O(1) <sup>a</sup> -Zn(1)-O(11)              | 87.35(8)   | N(1) <sup>a</sup> -Zn(4)-O(1) <sup>a</sup> | 83.23(8)   |
| O(1) <sup>a</sup> -Zn(1)-O(11) <sup>a</sup> | 92.65(8)   | N(1) <sup>a</sup> -Zn(4)-O(4) <sup>a</sup> | 77.92(9)   |
| O(6)-Zn(1)-O(6) <sup>a</sup>                | 180.00(11) | N(1) <sup>a</sup> -Zn(4)-O(8)              | 141.29(10) |
| O(6)-Zn(1)-O(11)                            | 89.37(8)   | N(1) <sup>a</sup> -Zn(4)-O(13)             | 106.23(9)  |
| O(6)-Zn(1)-O(11) <sup>a</sup>               | 90.63(8)   | O(1) <sup>a</sup> -Zn(4)-O(4) <sup>a</sup> | 160.13(8)  |
| O(6) <sup>a</sup> -Zn(1)-O(11)              | 93.69(10)  | O(1) <sup>a</sup> -Zn(4)-O(8)              | 95.40(9)   |
| O(6) <sup>a</sup> -Zn(1)-O(11) <sup>a</sup> | 86.31(10)  | O(1) <sup>a</sup> -Zn(4)-O(13)             | 94.31(9)   |
| O(11)-Zn(1)-O(11) <sup>a</sup>              | 180.00(11) | O(4) <sup>a</sup> -Zn(4)-O(8)              | 95.40(10)  |
| N(3)-Zn(2)-O(2)                             | 127.42(10) | O(4) <sup>a</sup> -Zn(4)-O(13)             | 96.92(10)  |
| N(3)-Zn(2)-O(7)                             | 111.39(10) | O(8)-Zn(4)-O(13)                           | 112.43(10) |
| N(3)-Zn(2)-O(11)                            | 84.27(9)   | N(4)-Zn(5)-N(5)                            | 129.19(17) |
| N(3)-Zn(2)-O(14)                            | 79.31(10)  | N(4)-Zn(5)-N(6)                            | 80.04(16)  |
| O(2)-Zn(2)-O(7)                             | 121.08(10) | N(4)-Zn(5)-O(5) <sup>b</sup>               | 123.69(15) |
| O(2)-Zn(2)-O(11)                            | 89.60(9)   | N(4)-Zn(5)-O(10)                           | 91.41(16)  |
| O(2)-Zn(2)-O(14)                            | 93.89(10)  | N(5)-Zn(5)-N(6)                            | 81.11(14)  |
| O(7)-Zn(2)-O(11)                            | 92.92(9)   | N(5)-Zn(5)-O(5) <sup>b</sup>               | 105.39(12) |
| O(7)-Zn(2)-O(14)                            | 100.59(11) | N(5)-Zn(5)-O(10)                           | 99.49(13)  |
| O(11)-Zn(2)-O(14)                           | 161.66(10) | N(6)-Zn(5)-O(5) <sup>b</sup>               | 97.95(12)  |
| N(2)-Zn(3)-O(3)                             | 107.88(10) | N(6)-Zn(5)-O(10)                           | 169.12(12) |
| N(2)-Zn(3)-O(6)                             | 86.46(9)   | O(5) <sup>b</sup> -Zn(5)-O(10)             | 92.37(11)  |
| N(2)-Zn(3)-O(9)                             | 77.47(9)   |                                            |            |

Symmetry codes: a - x, - y, - z; b - x- 1/2, y + 1/2, - z + 1/2.

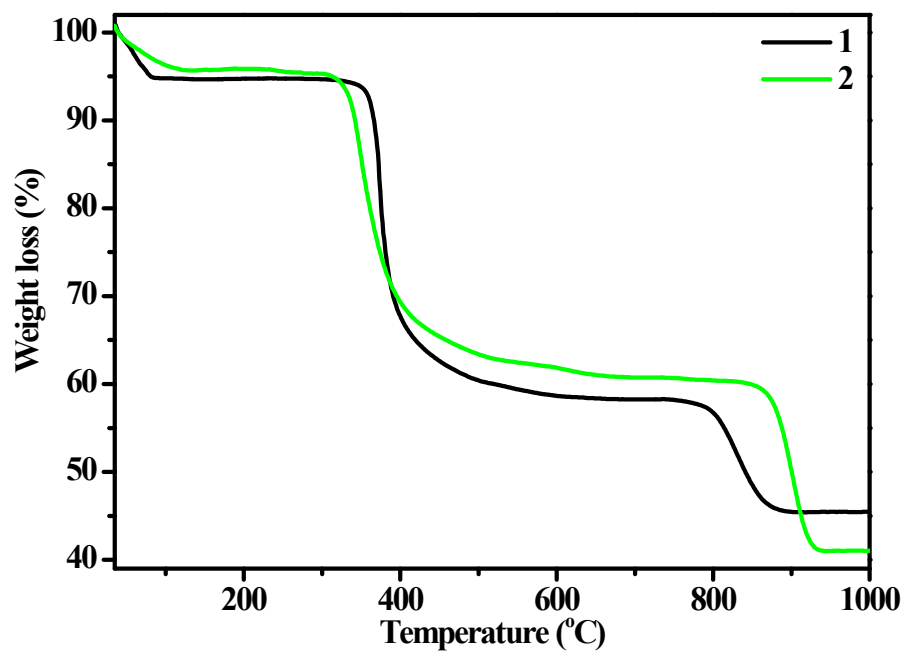

Fig. S1 TGA curves of compounds 1-2.

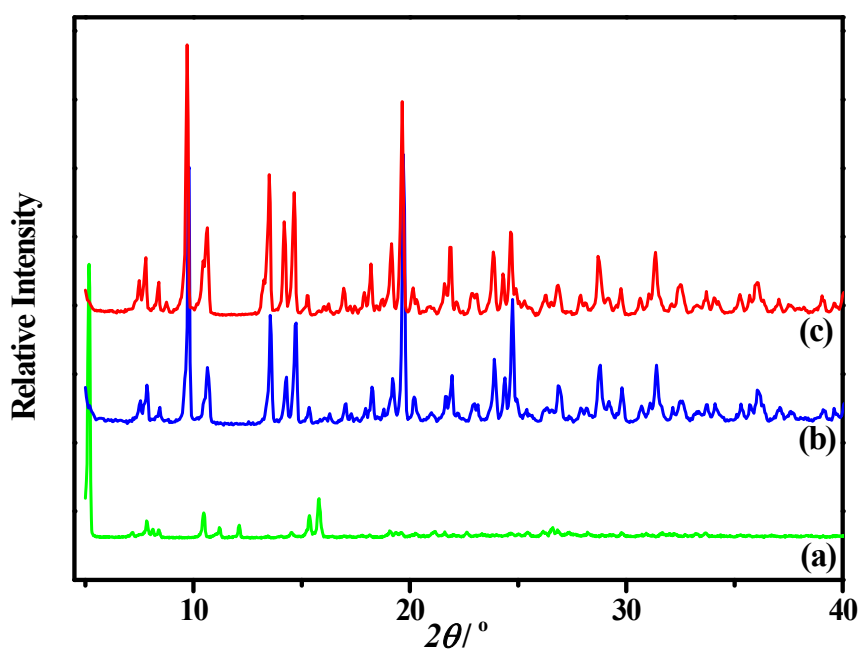

Fig. S2 Powder XRD patterns of as-prepared 1 (a), solids 1-100 (b) and 1-250 (c).

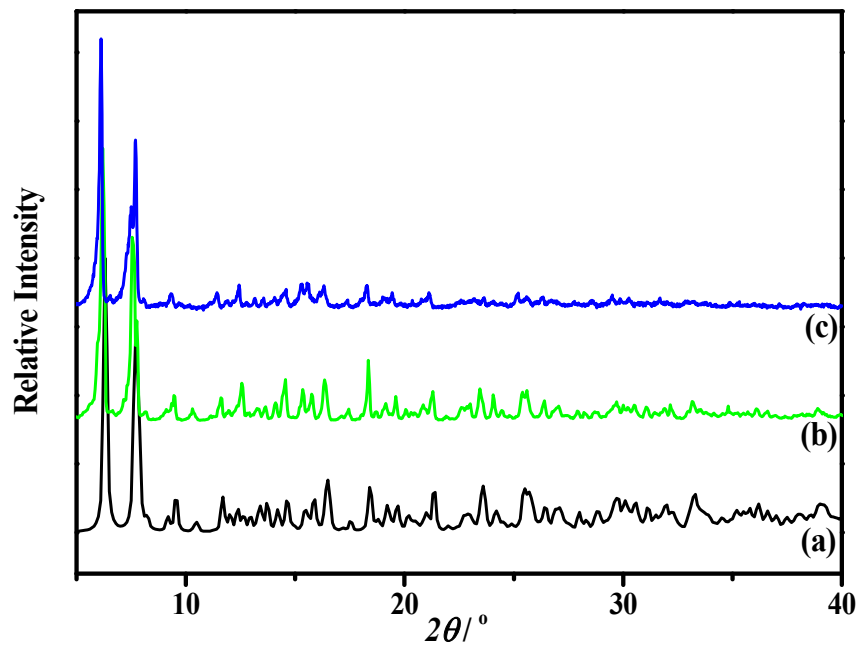

**Fig. S3** Powder XRD patterns of compound **2** (a) simulated from single-crystal X-ray data, and experimental data for as-prepared **2** (b) and solid **2-250** (c)

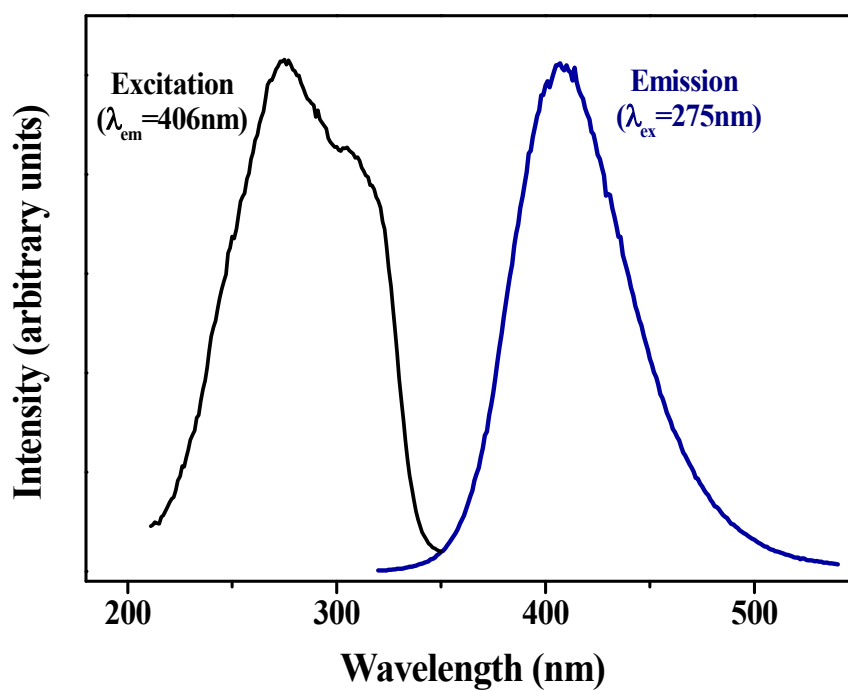

**Fig. S4** Emission and excitation spectra for solid **1** at room temperature.

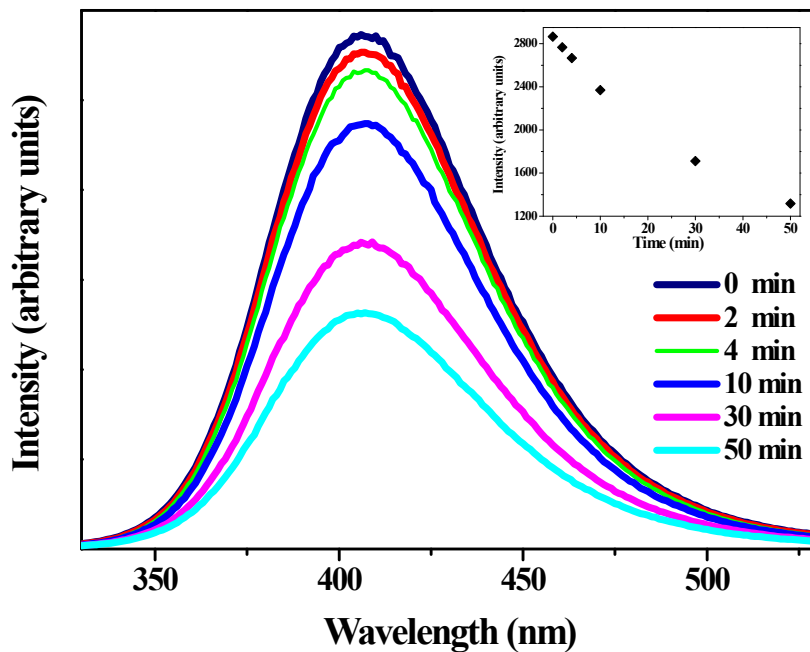

**Fig. S5** Fluorescent spectra for solid **1-250** with different UV irradiation time at 270 nm. Inset: fluorescent intensity at  $\lambda_{\text{max(em)}}$  as a function of UV irradiation time at 270 nm.

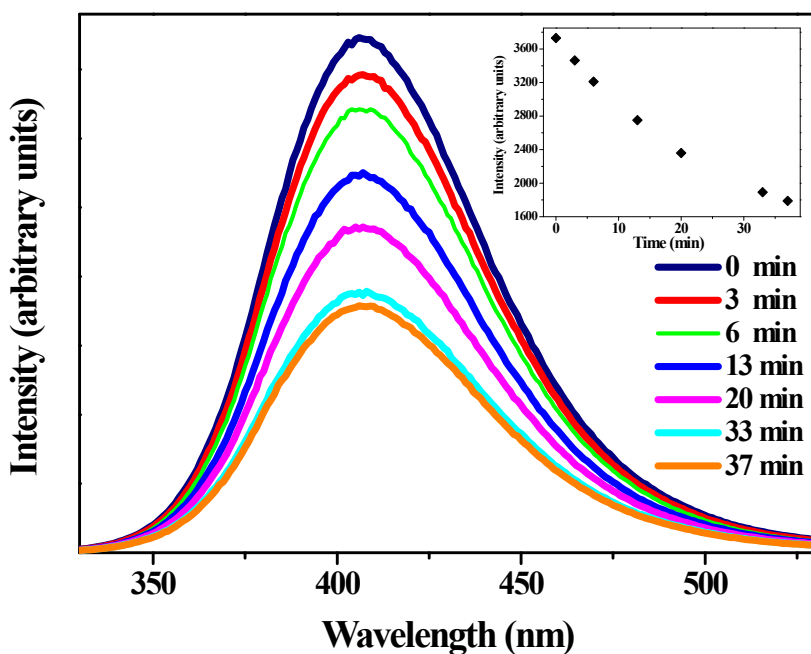

**Fig. S6** Fluorescent spectra for solid **1-100D** with different UV irradiation time at 273 nm. Inset: fluorescent intensity at  $\lambda_{\text{max(em)}}$  as a function of UV irradiation time at 273 nm.



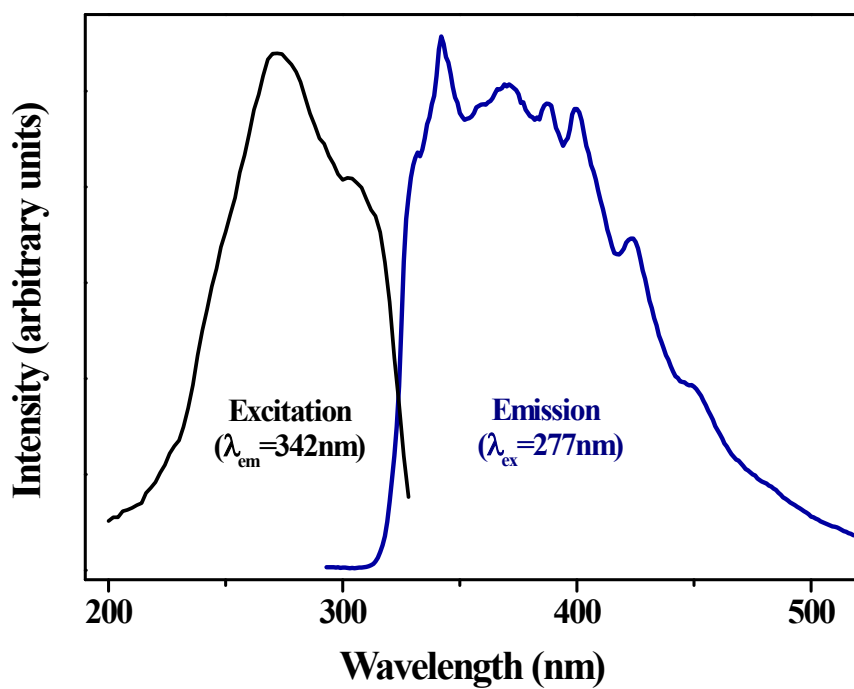

Fig. S7 Emission and excitation spectra for compound 2 at room temperature.

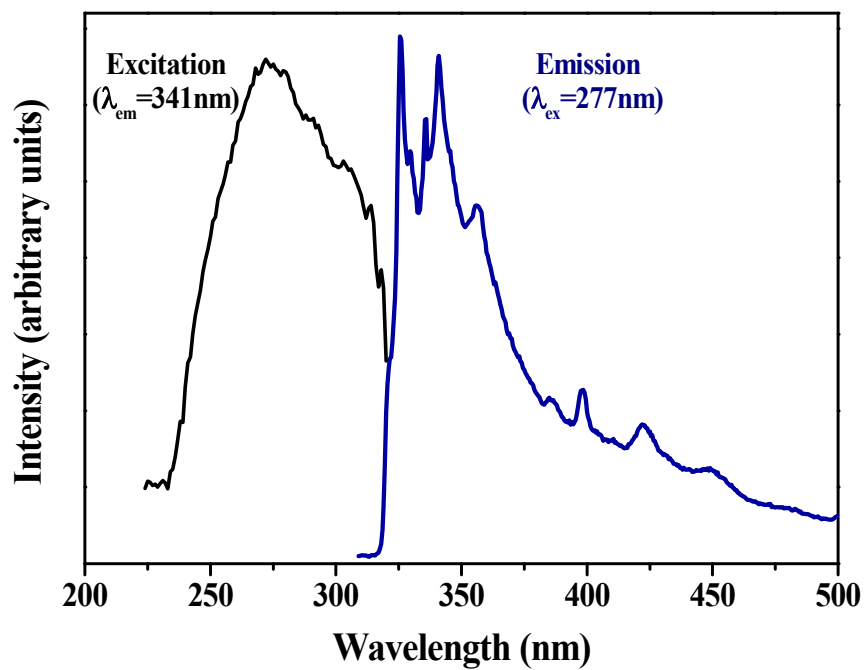

Fig. S8 Emission and excitation spectra for compound 2 at 10 K.

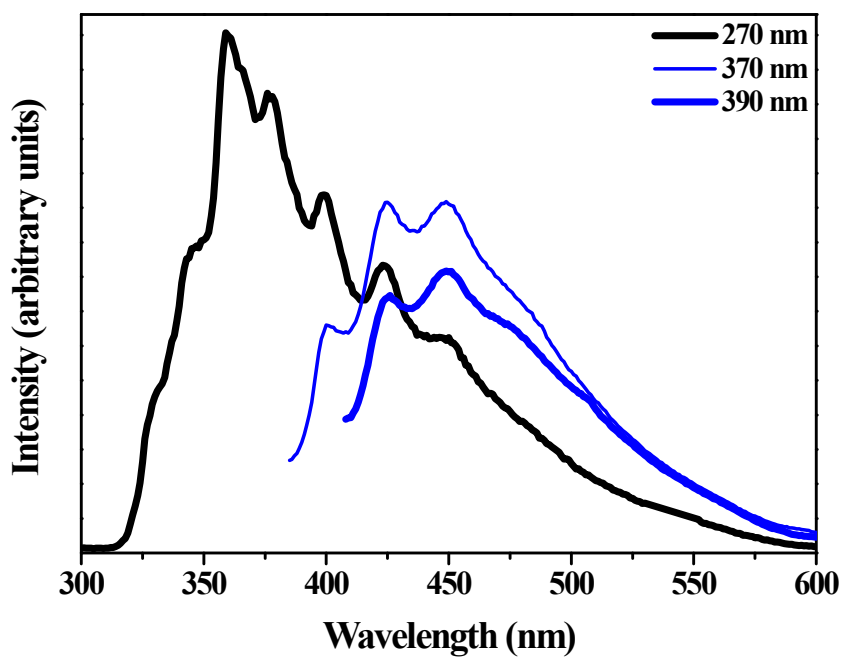

**Fig. S9** Emission spectra for solid 2-150 upon different wavelength of excited light at room temperature.

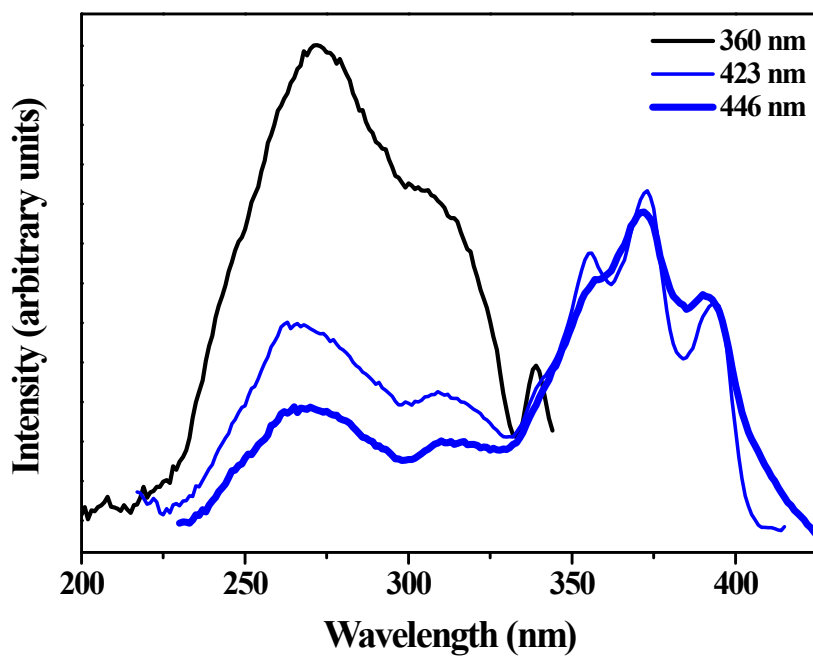

**Fig. S10** Excitation spectra for solid 2-150 upon emission fixed at 360, 423 and 446 nm under room temperature, respectively.

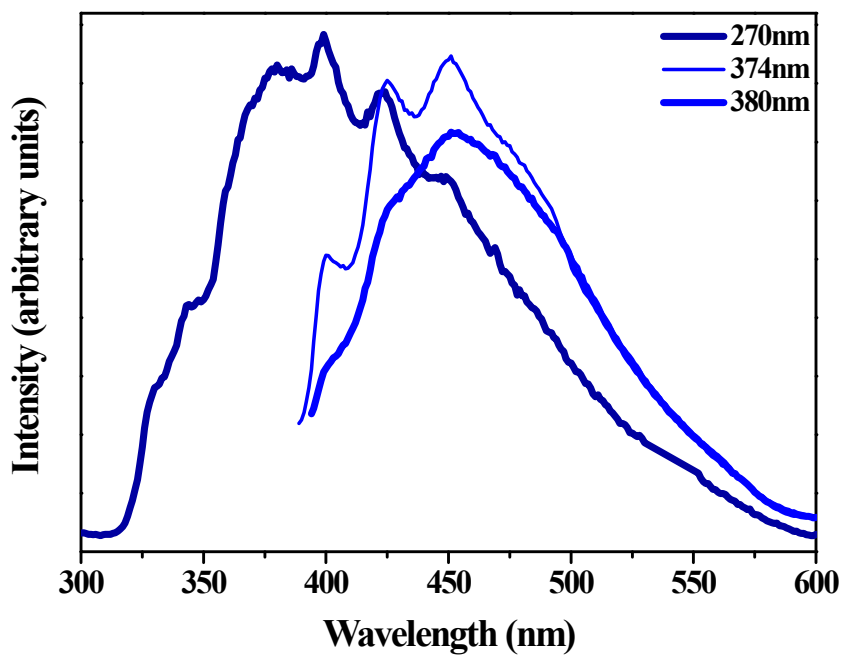

**Fig. S11** Emission spectra for solid 2-200 upon different wavelengths of excited light at room temperature.

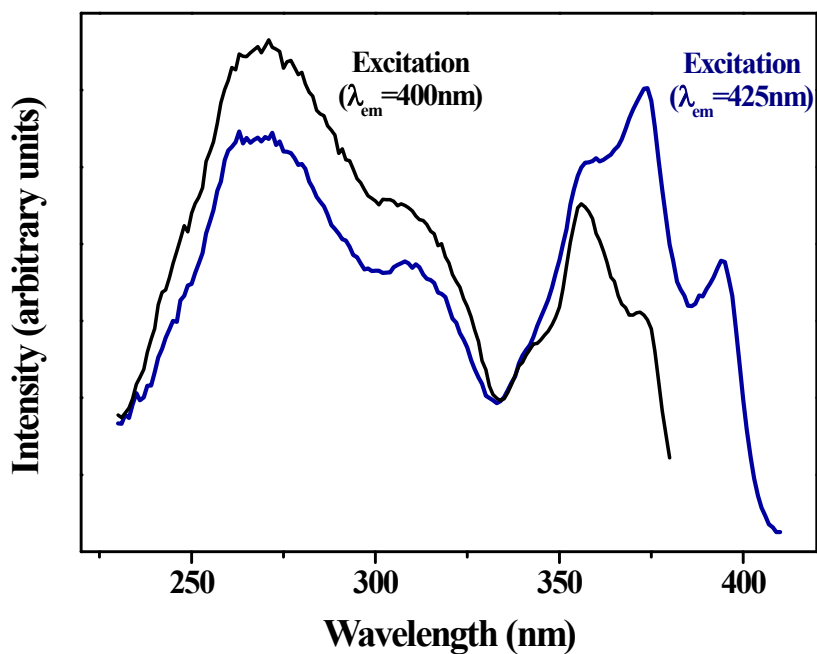

**Fig. S12** Excitation spectra for solid 2-200 upon emission fixed at 400 and 425 nm under room temperature, respectively.

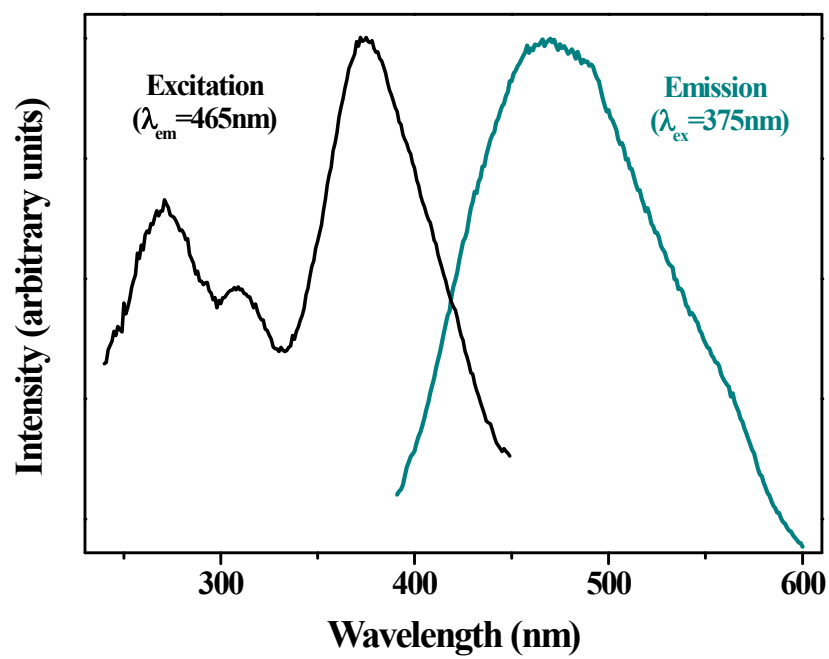

**Fig. S13** Emission and excitation spectra for solid **2-250** at room temperature.
